# Supplementary material for: Antibacterial Silver Modified Gallium Metal-Organic Frameworks for Odontogenic Infections
Source: Research Square preprint supplement (doi:10.21203/rs.3.rs-6954848/v1), 2025-08-06
Supplement: Supplementary file 1 [file 2c34f1f364be71c4a224e847.docx]

**Supporting Information**

**Antibacterial Silver Modified Gallium Metal-Organic Frameworks for Odontogenic Infections**

Fellype Diorgennes Cordeiro Gomes, Diptomit Biswas, Mary Cristina Ferreira Alves, Severino Alves Júnior, Scott H. Medina

Content Page Number

**Supplementary Fig. S1.** Optical density growth curves for *S. mitis* and *S. pneumoniae* **S3**

**
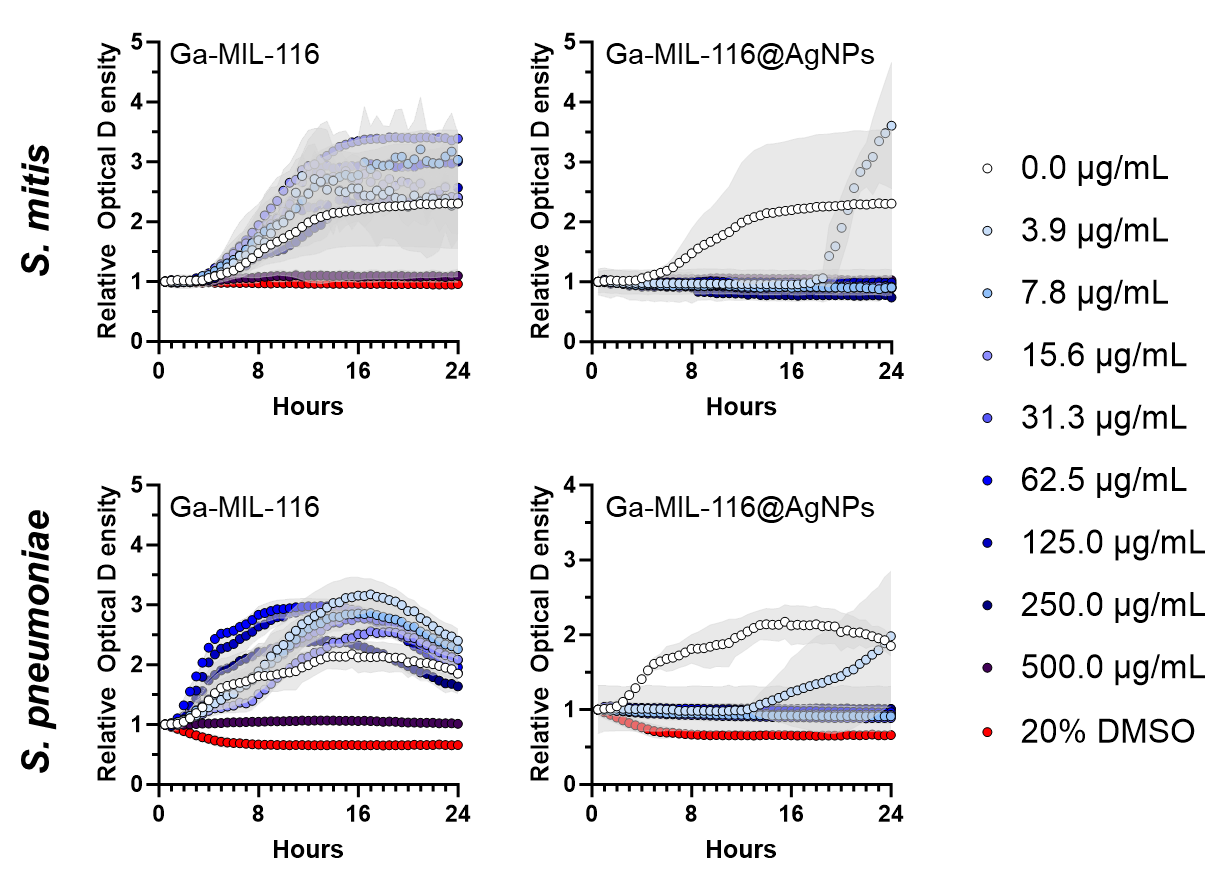
**

**Figure S1:** Time-dependent relative optical density of *S. mitis* (top) and *S. pneumoniae* (bottom) microbes grown in the presence of Ga-MIL-116 (left) or Ga-MIL-116@AgNPs (right). Untreated (0.0 μg/mL) and 20% DMSO treated samples included as negative and positive controls, respectively. Standard deviations of the curves are shown by the respective light gray colored overlay.
